# Supplementary material
Source: ML conference proceedings conference paper supplement (https://proceedings.mlr.press/v89/huggins19a.html)
Supplement: Supplementary file [file huggins19a-supp.pdf]

# Supplementary Material for *Scalable Gaussian Process Inference with Finite-data Mean and Variance Guarantees*

## A Experiments

Table 1: Datasets used for experiments. All datasets from the UCI Machine Learning Repository<sup>a</sup> except for synthetic and delays10k datasets.

$K$  = number of datapoints used to construct  $\nu$  (approximately 10% of  $N_{\text{train}}$ )

| Name                   | $N_{\text{train}}$ | $N_{\text{test}}$ | $d$ | $K$ | Name         | $N_{\text{train}}$ | $N_{\text{test}}$ | $d$ | $K$ |
|------------------------|--------------------|-------------------|-----|-----|--------------|--------------------|-------------------|-----|-----|
| synthetic              | 1000               | 1000              | 1   | 100 | abalone      | 3177               | 1000              | 8   | 300 |
| delays10k <sup>b</sup> | 8000               | 2000              | 8   | 800 | airfoil      | 1103               | 400               | 5   | 100 |
| CCPP                   | 7568               | 2000              | 4   | 700 | wine quality | 3898               | 1000              | 11  | 300 |

<sup>a</sup> <http://archive.ics.uci.edu/ml/index.php>

<sup>b</sup> Hensman et al. [5]

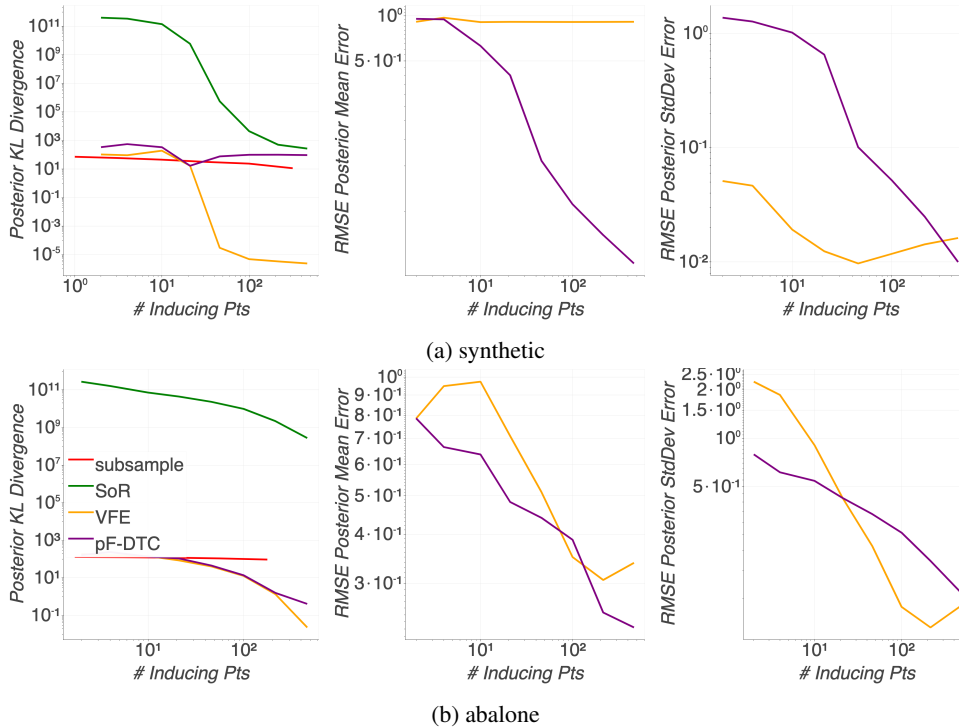

Figure A.1: KL divergences of the approximate posteriors and root mean squared error of the approximate posteriors for the VFE and pF-DTC trials with the smallest objective values.

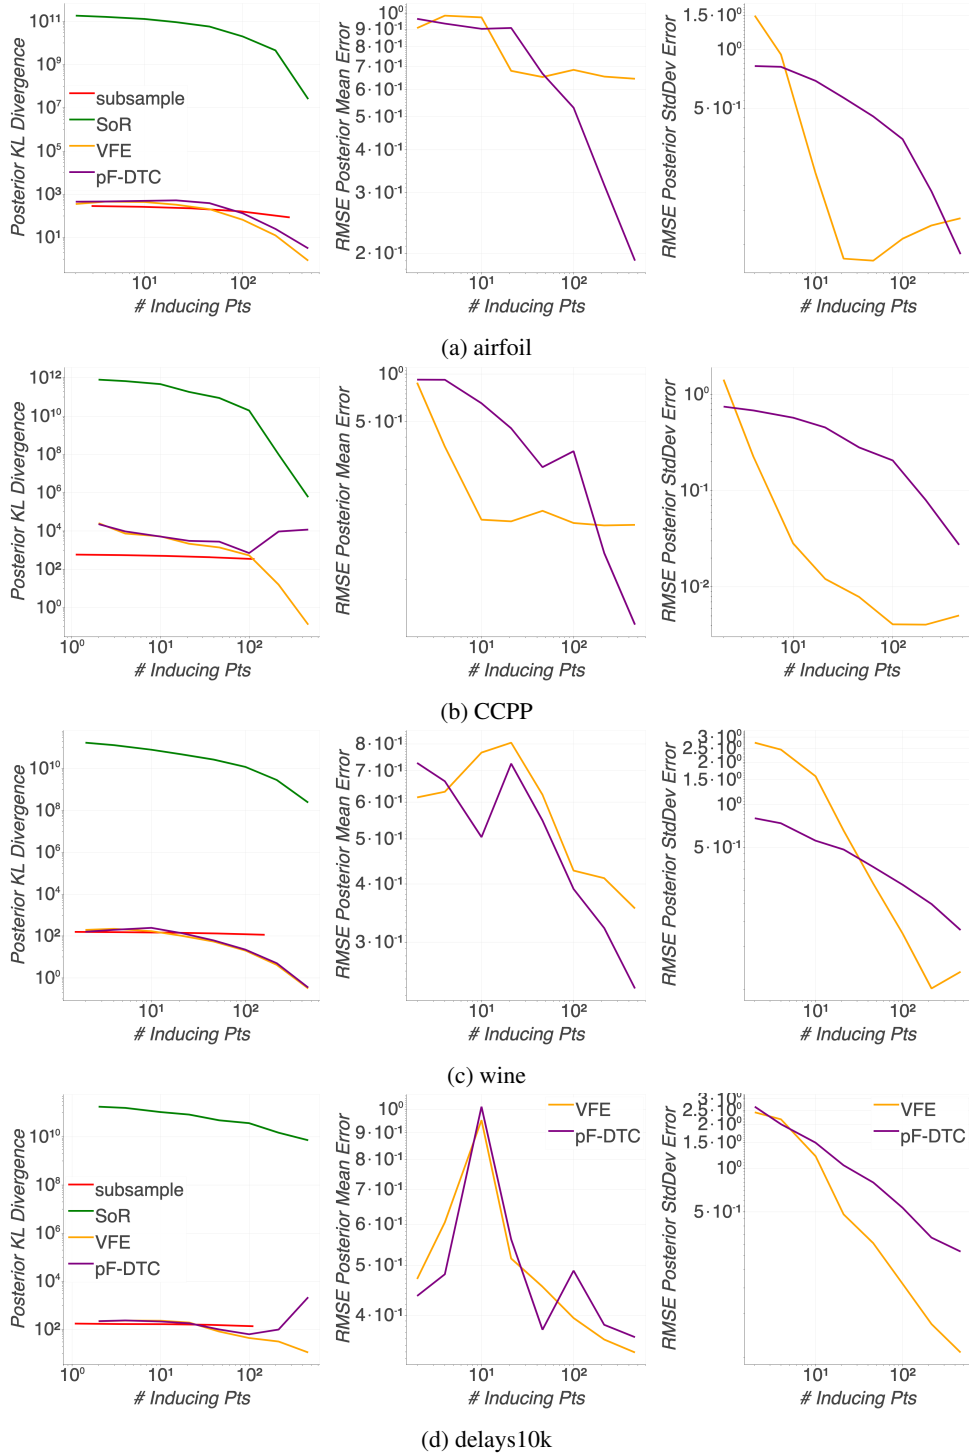

Figure A.2: KL divergences of the approximate posteriors and root mean squared error of the approximate posteriors for the VFE and pF-DTC trials with the smallest objective values.

## B Proof of Proposition 3.1

Choose the means and variances of  $\eta$  and  $\tilde{\eta}$  such that  $(\tilde{\mu} - \mu)^2 = \tilde{s}^2 \{\exp(2\delta) - 1\}$  and  $s^2 = \exp(2\delta) \tilde{s}^2$ . We then have that

$$\begin{aligned}
& \text{KL}(\tilde{\eta} \parallel \eta) \\
&= 0.5 \{ \tilde{s}^2 / s^2 - 1 + \log(s^2 / \tilde{s}^2) + (\tilde{\mu} - \mu)^2 / s^2 \} \\
&= 0.5 \{ \tilde{s}^2 / \{\exp(2\delta) \tilde{s}^2\} - 1 + \log\{\exp(2\delta) \tilde{s}^2 / \tilde{s}^2\} + \tilde{s}^2 \{\exp(2\delta) - 1\} / \{\exp(2\delta) \tilde{s}^2\} \} \\
&= 0.5 [\exp(-2\delta) - 1 + \log\{\exp(2\delta)\} + \{\exp(2\delta) - 1\} \exp(-2\delta)] \\
&= \delta.
\end{aligned}$$

## C Details of Example 4.1

We take  $\mathbb{H}$  to be the reproducing kernel Hilbert space with reproducing kernel  $r$ . The posterior covariance functions for  $\eta$  and  $\tilde{\eta}$  are equal to

$$k_{\mathcal{D}}(x, x') = e^{-(x-x')^2/2} - (1 + \sigma^2)^{-1} e^{-x^2/2 - (x')^2/2} \quad (\text{C.1})$$

while their posterior means are, respectively,  $\mu(x) = (1 + \sigma^2)^{-1} e^{-x^2/2} t$  and  $\tilde{\mu}(x) = (1 + \sigma^2)^{-1} e^{-x^2/2} \tilde{t}$ . Define the induced kernel  $k'(x, x') := \langle k_x, k_{x'} \rangle$ . Since their covariance operators are equal, the 2-Wasserstein distance between the  $\eta$  and  $\tilde{\eta}$  is [2, Thm. 3.5]

$$\begin{aligned}
\mathcal{W}_2(\eta, \tilde{\eta}) &= \|\mu - \tilde{\mu}\| = \|k(0, \cdot)\| (1 + \sigma^2)^{-1} |t - \tilde{t}| \\
&= \sqrt{k'(0, 0)} (1 + \sigma^2)^{-1} |t - \tilde{t}|.
\end{aligned} \quad (\text{C.2})$$

The log-likelihoods associated with  $\eta$  and  $\tilde{\eta}$  are, respectively,  $\mathcal{L}(f) := -\frac{1}{2\sigma^2} (f(0) - t)^2$  and  $\tilde{\mathcal{L}}(f) := -\frac{1}{2\sigma^2} (f(0) - \tilde{t})^2$ . Using Lemma F.3, in the non-preconditioned case we have

$$\begin{aligned}
d_{\mathbb{F}, \nu}(\eta, \tilde{\eta})^2 &= \mathbb{E}_{f \sim \nu} [\langle \mathcal{D}\mathcal{L}, \mathcal{D}\mathcal{L} \rangle + \langle \mathcal{D}\tilde{\mathcal{L}}, \mathcal{D}\tilde{\mathcal{L}} \rangle - 2\langle \mathcal{D}\mathcal{L}, \mathcal{D}\tilde{\mathcal{L}} \rangle] \\
&= \sigma^{-4} r(0, 0) [(t - \hat{\mu}(0))^2 + (\tilde{t} - \hat{\mu}(0))^2 - 2(t - \hat{\mu}(0))(\tilde{t} - \hat{\mu}(0))] \\
&= \sigma^{-4} r(0, 0) (t - \tilde{t})^2.
\end{aligned} \quad (\text{C.3})$$

Eqs. (C.2) and (C.3) together show that  $c = \sqrt{r(0, 0)/k'(0, 0)}$ .

The preconditioned case is almost identical to Eq. (C.3). Using Lemmas F.1 and F.4 and Eq. (C.1), for any  $f \in \mathbb{H}$ ,

$$\mathcal{C}_{\tilde{\eta}} \mathcal{D}\mathcal{L}(f) = -(1 + \sigma^2)^{-1} (f(0) - t) k(0, \cdot)$$

and similarly for  $\mathcal{C}_{\tilde{\eta}} \mathcal{D}\tilde{\mathcal{L}}(f)$ . Hence,

$$\begin{aligned}
d_{\text{pF}, \nu}(\eta \parallel \tilde{\eta}) &= \mathbb{E}_{f \sim \nu} [\langle \mathcal{C}_{\tilde{\eta}} \mathcal{D}\mathcal{L}, \mathcal{C}_{\tilde{\eta}} \mathcal{D}\mathcal{L} \rangle + \langle \mathcal{C}_{\tilde{\eta}} \mathcal{D}\tilde{\mathcal{L}}, \mathcal{C}_{\tilde{\eta}} \mathcal{D}\tilde{\mathcal{L}} \rangle - 2\langle \mathcal{C}_{\tilde{\eta}} \mathcal{D}\mathcal{L}, \mathcal{C}_{\tilde{\eta}} \mathcal{D}\tilde{\mathcal{L}} \rangle] \\
&= (1 + \sigma^2)^{-2} k'(0, 0) [(t - \hat{\mu}(0))^2 + (\tilde{t} - \hat{\mu}(0))^2 - 2(t - \hat{\mu}(0))(\tilde{t} - \hat{\mu}(0))] \\
&= (1 + \sigma^2)^{-2} k'(0, 0) (t - \tilde{t})^2.
\end{aligned} \quad (\text{C.4})$$

Eqs. (C.2) and (C.4) together show that  $d_{\text{pF}, \nu}(\eta \parallel \tilde{\eta}) = \mathcal{W}_2(\eta, \tilde{\eta})$ .

## D Proof of Theorem 4.3

Theorem 4.3 will follow almost immediately after we develop a number of preliminary results. For more details on infinite-dimensional SDEs and related ideas, we recommend Hairer et al. [3, 4] and Da Prato and Zabczyk [1].

The notation in this section differs slightly from the rest of the paper in order to follow the conventions of the stochastic processes literature. Let  $W$  denote a  $\mathcal{C}$ -Wiener process [1, Definition 4.2], where  $\mathcal{C} : \mathbb{H} \rightarrow \mathbb{H}$  is the linear, self-adjoint, positive semi-definite, trace-class operator. Let  $\mu \in \mathbb{H}$  and let

$b, \tilde{b} : \mathbb{H} \rightarrow \mathbb{R}$  and consider the following infinite-dimensional stochastic differential equations (SDEs) in  $\mathbb{H}$ :

$$dX_t = (\mu - X_t)dt + b(X_t)dt + \sqrt{2}dW_t \quad (\text{D.1})$$

$$dY_t = (\mu - Y_t)dt + \tilde{b}(Y_t)dt + \sqrt{2}dW_t. \quad (\text{D.2})$$

We will need the constructions from the following lemma, the proof of which is deferred to Appendix D.1.

**Lemma D.1.** *Let  $\tilde{\mathbb{H}} := \mathbb{H} \oplus \mathbb{H}$ , the direct sum of  $\mathbb{H}$  with itself, for which the inner product is given by*

$$\langle (x_1, x_2), (y_1, y_2) \rangle_{\tilde{\mathbb{H}}} = \langle x_1, y_1 \rangle + \langle x_2, y_2 \rangle.$$

*Define the self-adjoint operator  $\tilde{\mathcal{C}} : \tilde{\mathbb{H}} \rightarrow \tilde{\mathbb{H}}$  given by  $(x, y) \mapsto (\mathcal{C}(x + y), \mathcal{C}(x + y))$ . Then Eqs. (D.1) and (D.2) can be written on a common probability space as*

$$d(X_t, Y_t) = (\mu, \mu)dt - (X_t, Y_t)dt + (b(X_t), \tilde{b}(Y_t))dt + \sqrt{2}d(W_t, W_t) \quad (\text{D.3})$$

or

$$(X_t, Y_t) = \int_0^t (\mu, \mu)ds - \int_0^t (X_s, Y_s)ds + \int_0^t (b(X_s), \tilde{b}(Y_s))ds + \sqrt{2}(W_t, W_t),$$

where  $t \mapsto (X_t, Y_t)$  is a process on  $\tilde{\mathbb{H}}$  and  $t \mapsto (W_t, W_t)$  is a  $\tilde{\mathcal{C}}$ -Wiener process on  $\tilde{\mathbb{H}}$ .

Let  $\mathcal{P}$  denote the space of Borel measures on  $\mathbb{H}$ . Recall that for any  $\eta \in \mathcal{P}$ , the  $\|\cdot\|_\eta$ -norm acting on functions  $A : \mathbb{H} \rightarrow \mathbb{H}$  is defined by

$$\|A\|_\eta := \left( \int \|A(x)\|^2 \eta(dx) \right)^{1/2}.$$

**Theorem D.2.** *Assume that Eq. (D.3) has a unique stationary law with the marginal stationary laws of Eqs. (D.1) and (D.2) given by  $\tilde{\eta}$  and  $\eta$  respectively. Suppose that for  $X \sim \tilde{\eta}$  and  $Y \sim \eta$ ,  $\mathbb{E}\|X\|^2 < \infty$  and  $\mathbb{E}\|Y\|^2 < \infty$ . Suppose that for some  $\alpha > 0$ ,  $b$  satisfies the one-sided Lipschitz condition*

$$\langle b(x) - b(y), x - y \rangle \leq (-\alpha + 1) \|x - y\|^2 \text{ for all } x, y \in \mathbb{H}.$$

Then

$$\mathcal{W}_2(\eta, \tilde{\eta}) \leq \alpha^{-1} \|b - \tilde{b}\|_\eta. \quad (\text{D.4})$$

We defer the proof to Appendix D.2.

**Proposition D.3.** *If the hypotheses of Theorem D.2 hold, then for any distribution  $\nu \in \mathcal{P}$  such that  $\nu \ll \eta$ ,*

$$\mathcal{W}_2(\eta, \tilde{\eta}) \leq \alpha^{-1} \left\| \frac{d\eta}{d\nu} \right\|_\infty^{1/2} \|b - \tilde{b}\|_\nu \quad (\text{D.5})$$

*Proof.* Using Hölder's inequality, we have

$$\begin{aligned} \|b - \tilde{b}\|_\eta^2 &= \int \|b(x) - \tilde{b}(x)\|^2 \eta(dx) \\ &= \int \frac{d\eta}{d\nu}(x) \|b(x) - \tilde{b}(x)\|^2 \nu(dx) \\ &\leq \left\| \frac{d\eta}{d\nu} \right\|_\infty \int \|b(x) - \tilde{b}(x)\|^2 \nu(dx). \end{aligned}$$

Eq. (D.5) follows by plugging the previous display into Eq. (D.4).  $\square$

**Proposition D.4.** *If  $\eta, \nu \in \mathcal{P}$ ,  $\mathcal{W}_2(\eta, \nu) \leq \varepsilon$  and  $\mathbb{H} = \mathbb{H}_r$ , then for all  $\mathbf{x} \in \mathcal{X}$ ,*

$$\begin{aligned} |\mu_\eta(\mathbf{x}) - \mu_\nu(\mathbf{x})| &\leq r(\mathbf{x}, \mathbf{x})^{1/2} \varepsilon \\ |k_\eta(\mathbf{x}, \mathbf{x})^{1/2} - k_\nu(\mathbf{x}, \mathbf{x})^{1/2}| &\leq \sqrt{6} r(\mathbf{x}, \mathbf{x})^{1/2} \varepsilon \\ |k_\eta(\mathbf{x}, \mathbf{x}) - k_\nu(\mathbf{x}, \mathbf{x})| &\leq 3 r(\mathbf{x}, \mathbf{x})^{1/2} \min(k_\eta(\mathbf{x}, \mathbf{x}), k_\nu(\mathbf{x}, \mathbf{x}))^{1/2} \varepsilon + 6 r(\mathbf{x}, \mathbf{x}) \varepsilon^2. \end{aligned}$$

We defer the proof to Appendix D.3.

The result will follow by taking  $\mathcal{C} = \mathcal{C}_{\bar{\eta}}$ . With this choice of  $\mathcal{C}$ ,  $b = 0$  and  $\mu = \mu_{\bar{\eta}}$ , so  $b$  satisfies the one-sided Lipschitz condition with  $\alpha = 1$ . The remaining hypotheses of Theorem D.2 hold by construction, so Theorem 4.3 follows by applying Propositions D.3 and D.4.

### D.1 Proof of Lemma D.1

We first check that the process  $t \mapsto (W_t, W_t)$  satisfies the definition of a Wiener process. It starts from 0, has continuous trajectories and independent increments. Furthermore,

$$\mathcal{L}((W_t, W_t) - (W_s, W_s)) = \mathcal{N}(0, (t-s)\tilde{\mathcal{C}}).$$

To see that for  $t \geq s$  the variance of  $(W_t, W_t) - (W_s, W_s)$  in  $\tilde{\mathbb{H}}$  is indeed equal to  $(t-s)\tilde{\mathcal{C}}$ , note that, for any  $(x_1, x_2), (y_1, y_2) \in \tilde{\mathbb{H}}$

$$\begin{aligned} & \mathbb{E} [\langle (x_1, x_2), (W_t, W_t) - (W_s, W_s) \rangle_{\tilde{\mathbb{H}}} \langle (y_1, y_2), (W_t, W_t) - (W_s, W_s) \rangle_{\tilde{\mathbb{H}}}] \\ &= \mathbb{E} [\langle (x_1, W_t - W_s) + (x_2, W_t - W_s), (y_1, W_t - W_s) + (y_2, W_t - W_s) \rangle] \\ &= \langle (t-s)\mathcal{C}x_1, y_1 \rangle + \langle (t-s)\mathcal{C}x_1, y_2 \rangle + \langle (t-s)\mathcal{C}x_2, y_1 \rangle + \langle (t-s)\mathcal{C}x_2, y_2 \rangle \\ &= \langle (t-s)\mathcal{C}(x_1 + x_2), y_1 \rangle + \langle (t-s)\mathcal{C}(x_1 + x_2), y_2 \rangle \\ &= \langle (t-s)\tilde{\mathcal{C}}(x_1, x_2), (y_1, y_2) \rangle_{\tilde{\mathbb{H}}}. \end{aligned}$$

Given that  $\mathcal{C}$  is self-adjoint, it follows that  $\tilde{\mathcal{C}}$  is self-adjoint as well:

$$\begin{aligned} \langle \tilde{\mathcal{C}}(x_1, x_2), (y_1, y_2) \rangle_{\tilde{\mathbb{H}}} &= \langle \mathcal{C}(x_1 + x_2), y_1 + y_2 \rangle \\ &= \langle x_1 + x_2, \mathcal{C}(y_1 + y_2) \rangle \\ &= \langle (x_1, x_2), \tilde{\mathcal{C}}(y_1, y_2) \rangle_{\tilde{\mathbb{H}}}. \end{aligned}$$

### D.2 Proof of Theorem D.2

We begin by quoting the Itô formula we will be using (see Da Prato and Zabczyk [1] for complete details):

**Theorem D.5** (Itô formula, Da Prato and Zabczyk [1, Theorem 4.32]). *Let  $H$  and  $U$  be two Hilbert spaces and  $W$  be a  $Q$ -Wiener process for a symmetric non-negative operator  $Q \in L(U)$ . Let  $U_0 = Q^{1/2}(U)$  and let  $L_2(U_0, H)$  be the space of all Hilbert-Schmidt operators from  $U_0$  to  $H$ . Assume that  $\Phi$  is an  $L_2(U_0, H)$ -valued process stochastically integrable in  $[0, T]$ ,  $\varphi$  is an  $H$ -valued predictable process Bochner integrable on  $[0, T]$  almost surely, and  $X(0)$  a  $H$ -valued random variable. Then the following process:*

$$X_t = X_0 + \int_0^t \varphi(s) ds + \int_0^t \Phi(s) dW_s, \quad t \in [0, T]$$

is well defined. Assume that a function  $F : [0, T] \times H \rightarrow \mathbb{R}$  and its partial derivatives  $F_t, F_x, F_{xx}$  are uniformly continuous on bounded subsets of  $[0, T] \times H$ . Under these conditions, almost surely, for all  $t \in [0, T]$ :

$$\begin{aligned} F(t, X_t) &= F(0, X_0) + \int_0^t \langle F_x(s, X_s), \Phi(s) dW_t \rangle + \int_0^t F_t(s, X_s) ds \\ &\quad + \int_0^t \langle F_x(s, X_s), \varphi(s) \rangle ds \\ &\quad + \int_0^t \frac{1}{2} \text{Tr} \left[ F_{xx}(s, X_s) (\Phi(s) Q^{1/2}) (\Phi(s) Q^{1/2})^* \right] ds. \end{aligned}$$

Let  $F : [0, \infty) \times \tilde{\mathbb{H}} \rightarrow \mathbb{R}$  be given by  $F(t; x, y) = e^{2\alpha t} \|x - y\|^2$ . Then the Fréchet derivative of  $F$  with respect to the space parameters is given by

$$F_{(x,y)}(t; x, y)[(h_1, h_2)] = 2e^{2\alpha t} \langle x - y, h_1 - h_2 \rangle. \quad (\text{D.6})$$

Eq. (D.6) holds because

$$\begin{aligned} & \frac{\left| \|x + h_1 - y - h_2\|^2 - \|x - y\|^2 - 2\langle x - y, h_1 - h_2 \rangle \right|}{\sqrt{\|h_1\|^2 + \|h_2\|^2}} \\ &= \frac{\|h_1 - h_2\|^2}{\sqrt{\|h_1\|^2 + \|h_2\|^2}} \\ &\leq 2\sqrt{\|h_1\|^2 + \|h_2\|^2} \xrightarrow{\|h_1\|, \|h_2\| \rightarrow 0} 0. \end{aligned}$$

Furthermore, the second Fréchet derivative with respect to the space parameters is

$$F_{(x,y),(x,y)}[(h_1, h_2), (h_3, h_4)] = 2e^{2\alpha t} \langle h_3 - h_4, h_1 - h_2 \rangle.$$

Note that  $\tilde{C}^{1/2}(x, y) = \frac{\sqrt{2}}{2} (C^{1/2}(x + y), C^{1/2}(x + y))$ . Using the one-sided Lipschitz condition and the Cauchy-Schwarz inequality, we obtain

$$\begin{aligned} & \langle b(X_t) - \tilde{b}(Y_t), X_t - Y_t \rangle \\ &= \langle b(X_t) - b(Y_t), X_t - Y_t \rangle + \langle b(Y_t) - \tilde{b}(Y_t), X_t - Y_t \rangle \\ &\leq (-\alpha + 1) \|X_t - Y_t\|^2 + \|b(Y_t) - \tilde{b}(Y_t)\| \|X_t - Y_t\|. \end{aligned} \quad (\text{D.7})$$

We will assume that we start the process  $t \mapsto (X_t, Y_t)$  at joint stationarity (with  $X_0 \sim \eta$  and  $Y_0 \sim \nu$ ). By the Itô formula given by Theorem D.5, applied to the process described by Eq. (D.3) and function  $F$  (so that  $\varphi(t) = (b(X_t), \tilde{b}(Y_t)) - (X_t, Y_t)$  in Theorem D.5):

$$\begin{aligned} e^{2\alpha t} \|X_t - Y_t\|^2 &= \|X_0 - Y_0\|^2 + \int_0^t 2\sqrt{2} e^{2\alpha s} \langle X_s - Y_s, dW_s - dW_s \rangle \\ &\quad + \int_0^t 2\alpha e^{2\alpha s} \|X_s - Y_s\|^2 ds \\ &\quad + \int_0^t 2e^{2\alpha s} \langle X_s - Y_s, b(X_s) - X_s - \tilde{b}(Y_s) + Y_s \rangle ds \\ &\quad + \int_0^t e^{2\alpha s} \text{Tr} [(x, y) \mapsto (\mathcal{C}(x + y) - \mathcal{C}(x + y), \mathcal{C}(x + y) - \mathcal{C}(x + y))] ds \\ &= \|X_0 - Y_0\|^2 + \int_0^t 2\alpha e^{2\alpha s} \|X_s - Y_s\|^2 ds \\ &\quad + \int_0^t 2e^{2\alpha s} \langle X_s - Y_s, b(X_s) - X_s - \tilde{b}(Y_s) + Y_s \rangle ds. \end{aligned}$$

Taking expectations on both sides (with respect to everything that is random and at the fixed time  $t$ ), multiplying by  $e^{-2\alpha t}$  and applying Eq. (D.7)

$$\begin{aligned} & \mathbb{E} \|X_t - Y_t\|^2 \\ &\leq e^{-2\alpha t} \mathbb{E} \|X_0 - Y_0\|^2 + \mathbb{E} \left[ \int_0^t 2e^{2\alpha(s-t)} \|b(Y_s) - \tilde{b}(Y_s)\| \|X_s - Y_s\| ds \right] \\ &\leq e^{-2\alpha t} \mathbb{E} \|X_0 - Y_0\|^2 \\ &\quad + \left( \int_0^t 2e^{2\alpha(s-t)} \mathbb{E} \|b(Y_s) - \tilde{b}(Y_s)\|^2 ds \right)^{1/2} \left( \int_0^t 2e^{2\alpha(s-t)} \mathbb{E} \|X_s - Y_s\|^2 ds \right)^{1/2} \quad (\text{D.8}) \\ &= e^{-2\alpha t} \mathbb{E} \|X_0 - Y_0\|^2 \\ &\quad + \left( \alpha^{-1/2} (1 - e^{-2\alpha t})^{1/2} \|b - \tilde{b}\|_\nu \right) \left( \alpha^{-1/2} (1 - e^{-2\alpha t})^{1/2} \left( \mathbb{E} \|X_t - Y_t\|^2 \right)^{1/2} \right) \quad (\text{D.9}) \\ &= e^{-2\alpha t} \mathbb{E} \|X_0 - Y_0\|^2 + \alpha^{-1} (1 - e^{-2\alpha t}) \|b - \tilde{b}\|_\nu \left( \mathbb{E} \|X_t - Y_t\|^2 \right)^{1/2}, \end{aligned}$$

where Eq. (D.8) follows by the Cauchy-Schwarz inequality and Eq. (D.9) follows from the assumption that we start the process  $t \mapsto (X_t, Y_t)$  at joint stationarity.

Now, dividing by  $(\mathbb{E}\|X_t - Y_t\|^2)^{1/2}$ , taking  $t \rightarrow \infty$  and noting that the process  $t \mapsto (X_t, Y_t)$  remains at joint stationarity, we obtain the result.

### D.3 Proof of Proposition D.4

Let  $f \sim \eta$  and  $g \sim \nu$  and define  $\bar{k}_\nu(\mathbf{x}, \mathbf{x}') := \mathbb{E}[g(\mathbf{x})g(\mathbf{x}')]$ . By Cauchy-Schwarz and Jensen's inequalities,

$$\begin{aligned} |\mu_\eta(\mathbf{x}) - \mu_\nu(\mathbf{x})| &= |\mathbb{E}[f(\mathbf{x}) - g(\mathbf{x})]| = |\mathbb{E}[\langle f - g, r_{\mathbf{x}} \rangle]| \\ &\leq \mathbb{E}[\|f - g\| \|r_{\mathbf{x}}\|] \leq r(\mathbf{x}, \mathbf{x})^{1/2} \mathbb{E}[\|f - g\|^2]^{1/2} \\ &\leq r(\mathbf{x}, \mathbf{x})^{1/2} \varepsilon. \end{aligned}$$

Without loss of generality we can assume  $\mu_\eta = 0$ , since if not then we consider the random variables  $\tilde{f} := f - \mu_\eta$  and  $\tilde{g} := g - \mu_\eta$  instead. It follows from the Cauchy-Schwarz inequality that

$$\begin{aligned} |k_\eta(\mathbf{x}, \mathbf{x}) - \bar{k}_\nu(\mathbf{x}, \mathbf{x})| &= |\mathbb{E}[f(\mathbf{x})^2 - g(\mathbf{x})^2]| \\ &= \mathbb{E}[(f(\mathbf{x}) - g(\mathbf{x}))(f(\mathbf{x}) + g(\mathbf{x}))] \\ &\leq \sqrt{\mathbb{E}[(f(\mathbf{x}) - g(\mathbf{x}))^2]} \sqrt{\mathbb{E}[(f(\mathbf{x}) + g(\mathbf{x}))^2]} \\ &\leq r(\mathbf{x}, \mathbf{x})^{1/2} \varepsilon \sqrt{2\mathbb{E}[f(\mathbf{x})^2 + g(\mathbf{x})^2]} \\ &\leq \sqrt{2} r(\mathbf{x}, \mathbf{x})^{1/2} \varepsilon (k_\eta(\mathbf{x}, \mathbf{x})^{1/2} + \bar{k}_\nu(\mathbf{x}, \mathbf{x})^{1/2}) \\ |k_\eta(\mathbf{x}, \mathbf{x})^{1/2} - \bar{k}_\nu(\mathbf{x}, \mathbf{x})^{1/2}| &\leq \sqrt{2} r(\mathbf{x}, \mathbf{x})^{1/2} \varepsilon. \end{aligned}$$

Also,

$$\bar{k}_\nu(\mathbf{x}, \mathbf{x})^{1/2} \leq \sqrt{k_\nu(\mathbf{x}, \mathbf{x}) + \mu_\nu(\mathbf{x})^2} \leq k_\nu(\mathbf{x}, \mathbf{x})^{1/2} + r(\mathbf{x}, \mathbf{x})^{1/2} \varepsilon.$$

We now have that

$$\begin{aligned} |k_\eta(\mathbf{x}, \mathbf{x}) - k_\nu(\mathbf{x}, \mathbf{x})| &= |k_\eta(\mathbf{x}, \mathbf{x}) - \bar{k}_\nu(\mathbf{x}, \mathbf{x}) + \mu_\nu(\mathbf{x})^2| \\ &\leq |k_\eta(\mathbf{x}, \mathbf{x}) - \bar{k}_\nu(\mathbf{x}, \mathbf{x})| + \mu_\nu(\mathbf{x})^2 \\ &\leq \sqrt{2} r(\mathbf{x}, \mathbf{x})^{1/2} \varepsilon (k_\eta(\mathbf{x}, \mathbf{x})^{1/2} + \bar{k}_\nu(\mathbf{x}, \mathbf{x})^{1/2}) + r(\mathbf{x}, \mathbf{x}) \varepsilon^2 \\ &\leq \sqrt{2} r(\mathbf{x}, \mathbf{x})^{1/2} \varepsilon (k_\eta(\mathbf{x}, \mathbf{x})^{1/2} + k_\nu(\mathbf{x}, \mathbf{x})^{1/2}) + (1 + \sqrt{2}) r(\mathbf{x}, \mathbf{x}) \varepsilon^2 \\ |k_\eta(\mathbf{x}, \mathbf{x})^{1/2} - k_\nu(\mathbf{x}, \mathbf{x})^{1/2}| &\leq \sqrt{2} r(\mathbf{x}, \mathbf{x})^{1/2} \varepsilon + \frac{(1 + \sqrt{2}) r(\mathbf{x}, \mathbf{x}) \varepsilon^2}{k_\eta(\mathbf{x}, \mathbf{x})^{1/2} + k_\nu(\mathbf{x}, \mathbf{x})^{1/2}}. \end{aligned}$$

Let  $a := \frac{1 + \sqrt{3 + 2\sqrt{2}}}{\sqrt{2}} r(\mathbf{x}, \mathbf{x})^{1/2} \varepsilon$ . If  $\max(k_\eta(\mathbf{x}, \mathbf{x})^{1/2}, k_\nu(\mathbf{x}, \mathbf{x})^{1/2}) \leq a$ , then clearly  $|k_\eta(\mathbf{x}, \mathbf{x})^{1/2} - k_\nu(\mathbf{x}, \mathbf{x})^{1/2}| \leq a$ . Otherwise we have

$$|k_\eta(\mathbf{x}, \mathbf{x})^{1/2} - k_\nu(\mathbf{x}, \mathbf{x})^{1/2}| \leq \sqrt{2} r(\mathbf{x}, \mathbf{x})^{1/2} \varepsilon + \frac{(1 + \sqrt{2}) r(\mathbf{x}, \mathbf{x}) \varepsilon^2}{a} = a.$$

Hence we conclude unconditionally that

$$|k_\eta(\mathbf{x}, \mathbf{x})^{1/2} - k_\nu(\mathbf{x}, \mathbf{x})^{1/2}| \leq \frac{1 + \sqrt{3 + 2\sqrt{2}}}{\sqrt{2}} r(\mathbf{x}, \mathbf{x})^{1/2} \varepsilon < \sqrt{6} r(\mathbf{x}, \mathbf{x})^{1/2} \varepsilon.$$

Thus, we also have that

$$\begin{aligned} |k_\eta(\mathbf{x}, \mathbf{x}) - k_\nu(\mathbf{x}, \mathbf{x})| &\leq \sqrt{2} r(\mathbf{x}, \mathbf{x})^{1/2} \varepsilon (k_\eta(\mathbf{x}, \mathbf{x})^{1/2} + k_\nu(\mathbf{x}, \mathbf{x})^{1/2}) + (1 + \sqrt{2}) r(\mathbf{x}, \mathbf{x}) \varepsilon^2 \\ &< \sqrt{2} r(\mathbf{x}, \mathbf{x})^{1/2} \varepsilon (2k_\eta(\mathbf{x}, \mathbf{x})^{1/2} + \sqrt{6} r(\mathbf{x}, \mathbf{x})^{1/2} \varepsilon) + (1 + \sqrt{2}) r(\mathbf{x}, \mathbf{x}) \varepsilon^2 \\ &= 2\sqrt{2} r(\mathbf{x}, \mathbf{x})^{1/2} k_\eta(\mathbf{x}, \mathbf{x})^{1/2} \varepsilon + (1 + \sqrt{2} + \sqrt{12}) r(\mathbf{x}, \mathbf{x}) \varepsilon^2 \\ &< 3 r(\mathbf{x}, \mathbf{x})^{1/2} k_\eta(\mathbf{x}, \mathbf{x})^{1/2} \varepsilon + 6 r(\mathbf{x}, \mathbf{x}) \varepsilon^2. \end{aligned}$$

The final inequality follows from Jensen's inequality (which implies that the 1-Wasserstein distance lower bound the 2-Wasserstein distance) and [7, Rmk. 6.5].

## E Proof of Proposition 4.5

We first write  $k$  in terms of the orthonormal basis of  $\mathbb{H}_k$ :

$$k(\mathbf{x}, \mathbf{x}') = \sum_{j \geq 1} e_j(\mathbf{x}) e_j(\mathbf{x}').$$

Define

$$r(\mathbf{x}, \mathbf{x}') := \sum_{j \geq 1} \lambda_j e_j(\mathbf{x}) e_j(\mathbf{x}').$$

If  $\sum_{j \geq 1} \lambda_j^{-1} < \infty$  then  $r$  dominates  $k$ . So given inputs  $\mathbf{X} = (\mathbf{x}_n)_{n=1}^N$ , and defining  $a_{nm,j} := e_j(\mathbf{x}_n) e_j(\mathbf{x}_m)$ , to show the existence of the required kernel  $r$  we need to show there exists a solution to

$$\forall (n, m) \in [N]^2, \quad \left| \sum_{j \geq 1} \lambda_j a_{nm,j} - \sum_{j \geq 1} a_{nm,j} \right| \leq \epsilon, \quad \sum_{j \geq 1} \lambda_j^{-1} < \infty, \quad \text{and} \quad \forall j \in \mathbb{N}, \lambda_j \geq 0.$$

By assumption on the pointwise decay of orthonormal basis elements, for all  $(n, m) \in [N]^2$ ,  $|a_{nm,j}| = o(j^{-2})$ . Define  $a_j := \max_{(n,m) \in [N]^2} |a_{nm,j}|$ . Therefore  $\sqrt{a_j} = o(j^{-1})$ ,  $\sum_{j \geq 1} \sqrt{a_j} < \infty$ , and there exists a  $J > 0$  such that

$$\forall j > J, \sqrt{a_j} < 1 \quad \text{and} \quad \sum_{j \geq J} \sqrt{a_j} < \epsilon.$$

Setting  $\lambda_j = 1$  for each  $j \in 1, \dots, J$  and  $\lambda_j = 1 + \sqrt{a_j}^{-1}$  for  $j > J$ , we have that for any  $(n, m) \in [N]^2$ ,

$$\left| \sum_{j \geq 1} \lambda_j a_{nm,j} - \sum_{j \geq 1} a_{nm,j} \right| = \left| \sum_{j \geq J} \frac{a_{nm,j}}{\sqrt{a_j}} \right| \leq \sum_{j \geq J} \sqrt{a_j} < \epsilon.$$

Finally since  $\sqrt{a_j} = o(j^{-1})$ ,  $\lambda_j = \omega(j)$ , and so  $\lambda_j^{-1} = o(j^{-1})$  yielding  $\sum_{j \geq 1} \lambda_j^{-1} < \infty$ .

## F Proof of Proposition 5.1

Let  $\mathcal{L}_n(f) := -\frac{1}{2\sigma^2} (f(\mathbf{x}_n) - y_n)^2$  denote the log-likelihood of the  $n$ th observation and recall that  $\mathbb{H} = \mathbb{H}_r$ .

**Lemma F.1.** For any  $f \in \mathbb{H}$ ,

$$\mathcal{D}\mathcal{L}_n(f) = -\sigma^{-2} (f(\mathbf{x}_n) - y_n) r_{\mathbf{x}_n}.$$

*Proof.* For  $g \in \mathbb{H}$ ,

$$\begin{aligned} & |\mathcal{L}_n(f+g) - \mathcal{L}_n(f) + \langle \sigma^{-2} (f(\mathbf{x}_n) - y_n) r(\mathbf{x}_n, \cdot), g \rangle| \\ &= \left| -\frac{1}{2\sigma^2} (f(\mathbf{x}_n) + g(\mathbf{x}_n) - y_n)^2 + \frac{1}{2\sigma^2} (f(\mathbf{x}_n) - y_n)^2 + \sigma^{-2} (f(\mathbf{x}_n) - y_n) g(\mathbf{x}_n) \right| \\ &\leq \frac{1}{2\sigma^2} g(\mathbf{x}_n)^2 = \frac{1}{2\sigma^2} \langle r(\mathbf{x}_n, \cdot), g \rangle^2 \leq \frac{r(\mathbf{x}_n, \mathbf{x}_n)}{2\sigma^2} \|g\|^2. \end{aligned}$$

□

**Lemma F.2.** For any  $f \in \mathbb{H}$ ,

$$\mathcal{D}\mathcal{L}(f) = -\sigma^{-2} (f(\mathbf{X}) - \mathbf{y})^\top r_{\mathbf{X}}$$

and

$$\mathcal{D}\tilde{\mathcal{L}}(f) = -\sigma^{-2} (\bar{Q}_{\mathbf{X}\tilde{\mathbf{X}}} f(\tilde{\mathbf{X}}) - \mathbf{y})^\top \bar{Q}_{\mathbf{X}\tilde{\mathbf{X}}} r_{\tilde{\mathbf{X}}}.$$

*Proof.* Both results follow directly from Lemma F.1.

□



**Lemma F.3.** *If  $\nu = \text{GP}(\hat{\mu}, \hat{k})$ , then*

$$\mathbb{E}_{f \sim \nu}[\langle \mathcal{D}\mathcal{L}_n(f), \mathcal{D}\mathcal{L}_m(f) \rangle] = \sigma^{-4} r(\mathbf{x}_n, \mathbf{x}_m) [\hat{k}(\mathbf{x}_n, \mathbf{x}_m) + (y_n - \hat{\mu}(\mathbf{x}_n))(y_m - \hat{\mu}(\mathbf{x}_m))].$$

*Proof.* Using Lemma F.1, we have

$$\begin{aligned} \mathbb{E}_{f \sim \nu}[\langle \mathcal{D}\mathcal{L}_n(f), \mathcal{D}\mathcal{L}_m(f) \rangle] &= \sigma^{-4} \langle r_{\mathbf{x}_n}, r_{\mathbf{x}_m} \rangle \mathbb{E}_{f \sim \nu}[(f(\mathbf{x}_n) - y_n)(f(\mathbf{x}_m) - y_m)] \\ &= \sigma^{-4} r(\mathbf{x}_n, \mathbf{x}_m) [\hat{k}(\mathbf{x}_n, \mathbf{x}_m) + (y_n - \hat{\mu}(\mathbf{x}_n))(y_m - \hat{\mu}(\mathbf{x}_m))]. \end{aligned}$$

□

**Lemma F.4.** *If  $\eta = \text{GP}(0, \ell)$  then  $(\mathcal{C}_\eta f)(\mathbf{x}) = \langle f, \ell_{\mathbf{x}} \rangle$ .*

*Proof.* Since  $(\mathcal{C}_\eta r_{\mathbf{x}'}) = \langle r_{\mathbf{x}'}, \ell_{\cdot} \rangle = \ell_{\mathbf{x}'}$ , for  $f \sim \eta$ ,

$$\langle r_{\mathbf{x}}, \mathcal{C}_\eta r_{\mathbf{x}'} \rangle = \langle r_{\mathbf{x}}, \ell_{\mathbf{x}'} \rangle = \ell(\mathbf{x}, \mathbf{x}') = \text{Cov}(f(\mathbf{x}), f(\mathbf{x}')).$$

□

**Lemma F.5.** *For the DTC log-likelihood approximation  $\tilde{\pi}$ ,*

$$(\mathcal{C}_{\tilde{\pi}} f)(\mathbf{x}) = (\mathcal{C}_{\pi_0} f)(\mathbf{x}) - \langle f, k_{\tilde{\mathbf{X}}} \rangle (k_{\tilde{\mathbf{X}}\tilde{\mathbf{X}}}^{-1} - \tilde{\Sigma}) k_{\tilde{\mathbf{X}}\mathbf{x}},$$

where  $\tilde{\Sigma} := (k_{\tilde{\mathbf{X}}\tilde{\mathbf{X}}} + \sigma^{-2} k_{\tilde{\mathbf{X}}\mathbf{X}} k_{\mathbf{X}\tilde{\mathbf{X}}})^{-1}$ .

*Proof.* Since  $\tilde{\pi}$  has covariance function  $k(\mathbf{x}, \mathbf{x}') - Q_{\mathbf{x}\mathbf{x}'} + k_{\mathbf{x}\tilde{\mathbf{X}}} \tilde{\Sigma} k_{\tilde{\mathbf{X}}\mathbf{x}}$  [6], the result follows from Lemma F.4. □

It follows from Lemmas F.2 and F.5 that

$$\begin{aligned} \mathcal{C}_{\tilde{\pi}} \mathcal{D}\tilde{\mathcal{L}}(f) &= -\sigma^{-2} (\bar{Q}_{\mathbf{X}\tilde{\mathbf{X}}} f(\tilde{\mathbf{X}}) - \mathbf{y})^\top K_{\mathbf{X}\tilde{\mathbf{X}}} \tilde{\Sigma} k_{\tilde{\mathbf{X}}} \\ \mathcal{C}_{\tilde{\pi}} \mathcal{D}\mathcal{L}(f) &= -\sigma^{-2} (f(\mathbf{X}) - \mathbf{y})^\top (k_{\mathbf{X}} - \bar{Q}_{\mathbf{X}\tilde{\mathbf{X}}} k_{\tilde{\mathbf{X}}} + K_{\mathbf{X}\tilde{\mathbf{X}}} \tilde{\Sigma} k_{\tilde{\mathbf{X}}}). \end{aligned}$$

We therefore have that

$$\begin{aligned} &-\sigma^2 \mathcal{C}_{\tilde{\pi}} \mathcal{D}(\mathcal{L} - \tilde{\mathcal{L}})(f) \\ &= (f(\mathbf{X}) - \mathbf{y})^\top (k_{\mathbf{X}} - \bar{Q}_{\mathbf{X}\tilde{\mathbf{X}}} k_{\tilde{\mathbf{X}}}) + (f(\mathbf{X}) - \bar{Q}_{\mathbf{X}\tilde{\mathbf{X}}} f(\tilde{\mathbf{X}}))^\top K_{\mathbf{X}\tilde{\mathbf{X}}} \tilde{\Sigma} k_{\tilde{\mathbf{X}}} \end{aligned}$$

Consider the limit  $r \rightarrow k$ , so  $k' \rightarrow k$ . Then

$$\begin{aligned} &\sigma^4 \|\mathcal{C}_{\tilde{\pi}} \mathcal{D}(\mathcal{L} - \tilde{\mathcal{L}})(f)\|^2 \\ &= (f(\mathbf{X}) - \mathbf{y})^\top (K_{\mathbf{X}\mathbf{X}} + \bar{Q}_{\mathbf{X}\tilde{\mathbf{X}}} K_{\tilde{\mathbf{X}}\tilde{\mathbf{X}}} \bar{Q}_{\mathbf{X}\tilde{\mathbf{X}}}^\top - 2K_{\mathbf{X}\tilde{\mathbf{X}}} \bar{Q}_{\mathbf{X}\tilde{\mathbf{X}}}^\top) (f(\mathbf{X}) - \mathbf{y}) \\ &\quad + (f(\mathbf{X}) - \mathbf{y})^\top (K_{\mathbf{X}\tilde{\mathbf{X}}} \tilde{\Sigma} K_{\tilde{\mathbf{X}}\mathbf{X}} - \bar{Q}_{\mathbf{X}\tilde{\mathbf{X}}} K_{\tilde{\mathbf{X}}\tilde{\mathbf{X}}} \tilde{\Sigma} K_{\tilde{\mathbf{X}}\mathbf{X}}) (f(\mathbf{X}) - \bar{Q}_{\mathbf{X}\tilde{\mathbf{X}}} f(\tilde{\mathbf{X}})) \\ &\quad + (f(\mathbf{X}) - \bar{Q}_{\mathbf{X}\tilde{\mathbf{X}}} f(\tilde{\mathbf{X}}))^\top K_{\mathbf{X}\tilde{\mathbf{X}}} \tilde{\Sigma} K_{\tilde{\mathbf{X}}\tilde{\mathbf{X}}} \tilde{\Sigma} K_{\tilde{\mathbf{X}}\mathbf{X}} (f(\mathbf{X}) - \bar{Q}_{\mathbf{X}\tilde{\mathbf{X}}} f(\tilde{\mathbf{X}})) \\ &= (f(\mathbf{X}) - \mathbf{y})^\top (K_{\mathbf{X}\mathbf{X}} - Q_{\mathbf{X}\mathbf{X}}) (f(\mathbf{X}) - \mathbf{y}) \\ &\quad + (f(\mathbf{X}) - \bar{Q}_{\mathbf{X}\tilde{\mathbf{X}}} f(\tilde{\mathbf{X}}))^\top S_{\mathbf{X}\mathbf{X}} (f(\mathbf{X}) - \bar{Q}_{\mathbf{X}\tilde{\mathbf{X}}} f(\tilde{\mathbf{X}})), \end{aligned}$$

where  $S_{\mathbf{X}\mathbf{X}} := K_{\mathbf{X}\tilde{\mathbf{X}}} \tilde{\Sigma} K_{\tilde{\mathbf{X}}\tilde{\mathbf{X}}} \tilde{\Sigma} K_{\tilde{\mathbf{X}}\mathbf{X}}$ . Let  $E_{\mathbf{X}\mathbf{X}} := K_{\mathbf{X}\mathbf{X}} - Q_{\mathbf{X}\mathbf{X}}$ . Taking expectations we get

$$\begin{aligned} &\mathbb{E}_\nu[(f(\mathbf{X}) - \mathbf{y})^\top E_{\mathbf{X}\mathbf{X}} (f(\mathbf{X}) - \mathbf{y})] \\ &= \mathbb{E}_\nu[(f(\mathbf{X}) - \hat{\mu}(\mathbf{X}) + \hat{\mu}(\mathbf{X}) - \mathbf{y})^\top E_{\mathbf{X}\mathbf{X}} (f(\mathbf{X}) - \hat{\mu}(\mathbf{X}) + \hat{\mu}(\mathbf{X}) - \mathbf{y})] \\ &= \text{Tr}(\hat{K}_{\mathbf{X}\mathbf{X}} E_{\mathbf{X}\mathbf{X}}) + (\hat{\mu}(\mathbf{X}) - \mathbf{y})^\top E_{\mathbf{X}\mathbf{X}} (\hat{\mu}(\mathbf{X}) - \mathbf{y}) \end{aligned}$$

and

$$\begin{aligned} &\mathbb{E}_\nu[(f(\mathbf{X}) - \bar{Q}_{\mathbf{X}\tilde{\mathbf{X}}} f(\tilde{\mathbf{X}}))^\top S_{\mathbf{X}\mathbf{X}} (f(\mathbf{X}) - \bar{Q}_{\mathbf{X}\tilde{\mathbf{X}}} f(\tilde{\mathbf{X}}))] \\ &= \mathbb{E}_\nu[\|(f(\mathbf{X}) - \hat{\mu}(\mathbf{X}) + \bar{Q}_{\mathbf{X}\tilde{\mathbf{X}}} \hat{\mu}(\tilde{\mathbf{X}}) - \bar{Q}_{\mathbf{X}\tilde{\mathbf{X}}} f(\tilde{\mathbf{X}}) + \hat{\mu}(\mathbf{X}) - \bar{Q}_{\mathbf{X}\tilde{\mathbf{X}}} \hat{\mu}(\tilde{\mathbf{X}}))^\top S_{\mathbf{X}\mathbf{X}}^{1/2}\|_2^2] \\ &= \text{Tr}(\hat{K}_{\mathbf{X}\mathbf{X}} S_{\mathbf{X}\mathbf{X}}) + \text{Tr}(\hat{K}_{\tilde{\mathbf{X}}\tilde{\mathbf{X}}} \bar{Q}_{\mathbf{X}\tilde{\mathbf{X}}}^\top S_{\mathbf{X}\mathbf{X}} \bar{Q}_{\mathbf{X}\tilde{\mathbf{X}}}) - 2 \text{Tr}(\hat{K}_{\tilde{\mathbf{X}}\mathbf{X}} S_{\mathbf{X}\mathbf{X}} \bar{Q}_{\mathbf{X}\tilde{\mathbf{X}}}) \\ &\quad + (\hat{\mu}(\mathbf{X}) - \bar{Q}_{\mathbf{X}\tilde{\mathbf{X}}} \hat{\mu}(\tilde{\mathbf{X}}))^\top S_{\mathbf{X}\mathbf{X}} (\hat{\mu}(\mathbf{X}) - \bar{Q}_{\mathbf{X}\tilde{\mathbf{X}}} \hat{\mu}(\tilde{\mathbf{X}})). \end{aligned}$$

Let  $S'_{\mathbf{X}\tilde{\mathbf{X}}} := K_{\mathbf{X}\tilde{\mathbf{X}}}\tilde{\Sigma}K_{\tilde{\mathbf{X}}\tilde{\mathbf{X}}}\tilde{\Sigma}$ . Putting everything together, conclude that

$$\begin{aligned}
& \sigma^4 \|\mathcal{C}_{\tilde{\pi}}\mathcal{D}(\mathcal{L} - \tilde{\mathcal{L}})\|_{\nu}^2 \\
&= \text{Tr}((\hat{K}_{\mathbf{X}\mathbf{X}} + (\hat{\mu}(\mathbf{X}) - \mathbf{y})(\hat{\mu}(\mathbf{X}) - \mathbf{y})^\top)(K_{\mathbf{X}\mathbf{X}} - Q_{\mathbf{X}\mathbf{X}})) \\
&\quad + \text{Tr}(\hat{K}_{\mathbf{X}\mathbf{X}}S_{\mathbf{X}\mathbf{X}}) + \text{Tr}(\hat{K}_{\tilde{\mathbf{X}}\tilde{\mathbf{X}}}\bar{Q}_{\mathbf{X}\tilde{\mathbf{X}}}^\top S_{\mathbf{X}\mathbf{X}}\bar{Q}_{\mathbf{X}\tilde{\mathbf{X}}}) - 2\text{Tr}(\hat{K}_{\tilde{\mathbf{X}}\mathbf{X}}S_{\mathbf{X}\mathbf{X}}\bar{Q}_{\mathbf{X}\tilde{\mathbf{X}}}) \\
&\quad + (\hat{\mu}(\mathbf{X}) - \bar{Q}_{\mathbf{X}\tilde{\mathbf{X}}}\hat{\mu}(\tilde{\mathbf{X}}))^\top S_{\mathbf{X}\mathbf{X}}(\hat{\mu}(\mathbf{X}) - \bar{Q}_{\mathbf{X}\tilde{\mathbf{X}}}\hat{\mu}(\tilde{\mathbf{X}})). \\
&= -\text{Tr}(K_{\tilde{\mathbf{X}}\mathbf{X}}(\hat{K}_{\mathbf{X}\mathbf{X}} + (\hat{\mu}(\mathbf{X}) - \mathbf{y})(\hat{\mu}(\mathbf{X}) - \mathbf{y})^\top)\bar{Q}_{\mathbf{X}\tilde{\mathbf{X}}}) \\
&\quad + \text{Tr}((K_{\tilde{\mathbf{X}}\mathbf{X}}\hat{K}_{\mathbf{X}\mathbf{X}} + K_{\tilde{\mathbf{X}}\mathbf{X}}\bar{Q}_{\mathbf{X}\tilde{\mathbf{X}}}\hat{K}_{\tilde{\mathbf{X}}\tilde{\mathbf{X}}}\bar{Q}_{\mathbf{X}\tilde{\mathbf{X}}}^\top - 2K_{\tilde{\mathbf{X}}\mathbf{X}}\bar{Q}_{\mathbf{X}\tilde{\mathbf{X}}}\hat{K}_{\tilde{\mathbf{X}}\mathbf{X}})S'_{\mathbf{X}\tilde{\mathbf{X}}}) \quad (\text{F.1}) \\
&\quad + (\hat{\mu}(\mathbf{X}) - \bar{Q}_{\mathbf{X}\tilde{\mathbf{X}}}\hat{\mu}(\tilde{\mathbf{X}}))^\top S'_{\mathbf{X}\tilde{\mathbf{X}}}K_{\tilde{\mathbf{X}}\mathbf{X}}(\hat{\mu}(\mathbf{X}) - \bar{Q}_{\mathbf{X}\tilde{\mathbf{X}}}\hat{\mu}(\tilde{\mathbf{X}})) + C(\mathbf{X}).
\end{aligned}$$

It is clear from Eq. (F.1) that all quantities can be computed while never instantiating a matrix larger than  $N \times M$ , hence, up to the constant  $C(\mathbf{X})$ , the pF divergence can be computed in  $O(NM^2)$  time and  $O(NM)$  space.

## References

- [1] G. Da Prato and J. Zabczyk. *Stochastic Equations in Infinite Dimensions*. Cambridge University Press, New York, NY, 2nd edition, 2014.
- [2] M. Gelbrich. On a Formula for the L2 Wasserstein Metric between Measures on Euclidean and Hilbert Spaces. *Mathematische Nachrichten*, 147(1):185–203, 1990.
- [3] M. Hairer, A. M. Stuart, J. Voss, and P. Wiberg. Analysis of SPDEs arising in path sampling part I: The Gaussian case. *Communications in Mathematical Sciences*, 3(4):587–603, Dec. 2005.
- [4] M. Hairer, A. M. Stuart, and J. Voss. Analysis of SPDEs arising in path sampling part II: The nonlinear case. *The Annals of Applied Probability*, 17(5/6):1657–1706, Oct. 2007.
- [5] J. Hensman, N. Fusi, and N. D. Lawrence. Gaussian Processes for Big Data. In *Uncertainty in Artificial Intelligence*, 2013.
- [6] J. Quiñonero-Candela and C. E. Rasmussen. A unifying view of sparse approximate Gaussian process regression. *Journal of Machine Learning Research*, 6:1939–1959, 2005.
- [7] C. Villani. *Optimal transport: old and new*, volume 338 of *Grundlehren der mathematischen Wissenschaften*. Springer, 2009.
